# Supplementary material for: Highly Efficient Phosphorescent Blue-Emitting [3+2+1] Coordinated Iridium (III) Complex for OLED Application
Source: PubMed Central journal article supplement (PMC8529235; doi:10.3389/fchem.2021.758357), 2021-10-07
Supplement: DataSheet1.pdf [file DataSheet1.pdf]

## Supplementary Material

The detailed procedure of measuring absolute quantum efficiency: 0.35 mg **Ir-dfpMepy-CN** was added into a 1ml glass bottle with 500  $\mu$ l DCM. After the solution is evenly mixed, 100  $\mu$ l mixed solution was transferred to a 5 ml volumetric flask DCM was then added into the 5 ml volumetric flask to get a  $2 \times 10^{-5}$  mol/L **Ir-dfpMepy-CN** solution. A cuvette with  $2 \times 10^{-5}$  mol/L **Ir-dfpMepy-CN** solution and reference cuvette are prepared for the quantum efficiency test by the absolute PL quantum yield spectrometer C11345 (Quantum-QY Hamamastu).

### 1 Supplementary Figures and Tables

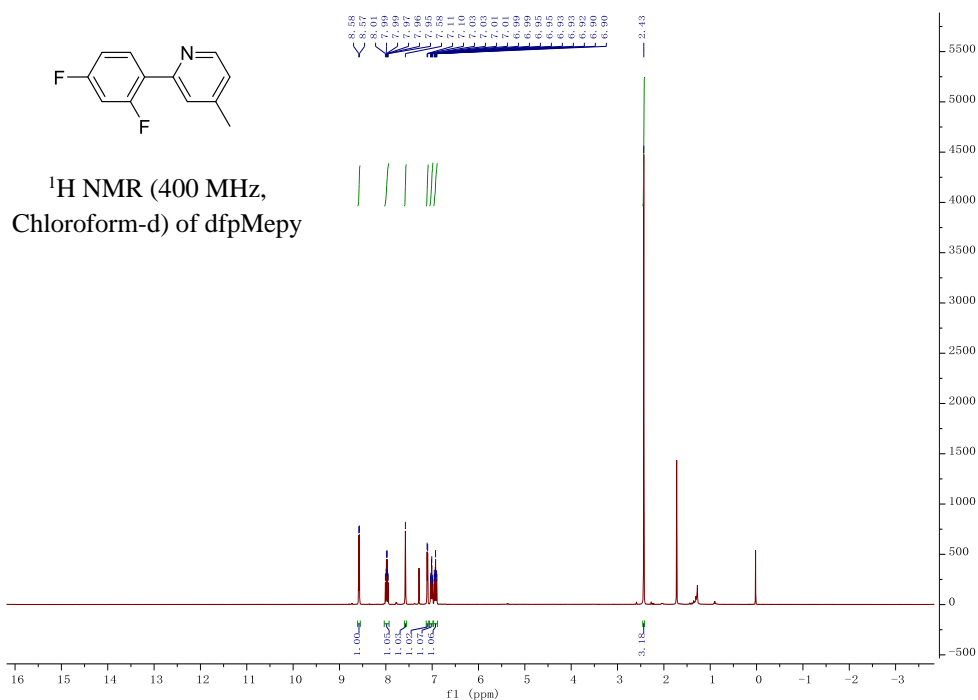

Supplementary figure 1. <sup>1</sup>H NMR of 2-(2,4-difluorophenyl)-4-methylpyridine(dfpMepy) in CDCl<sub>3</sub>.

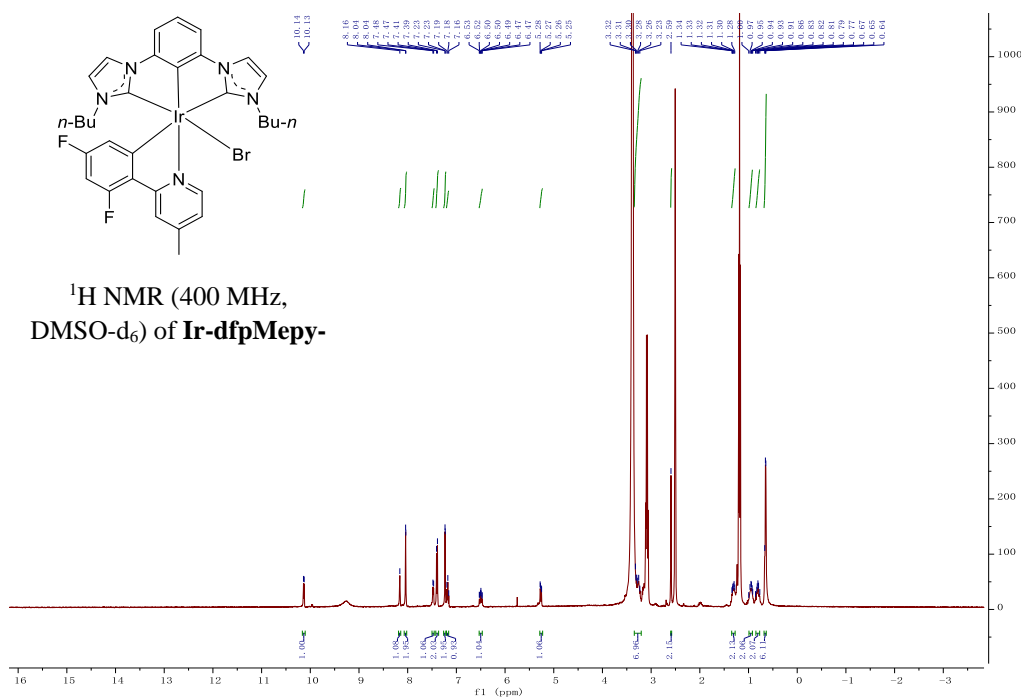

<sup>1</sup>H NMR (400 MHz, DMSO-d<sub>6</sub>) of Ir-dfpMepy-

Supplementary figure 2. <sup>1</sup>H NMR of Ir-dfpMepy-Br in DMSO-d<sub>6</sub>.

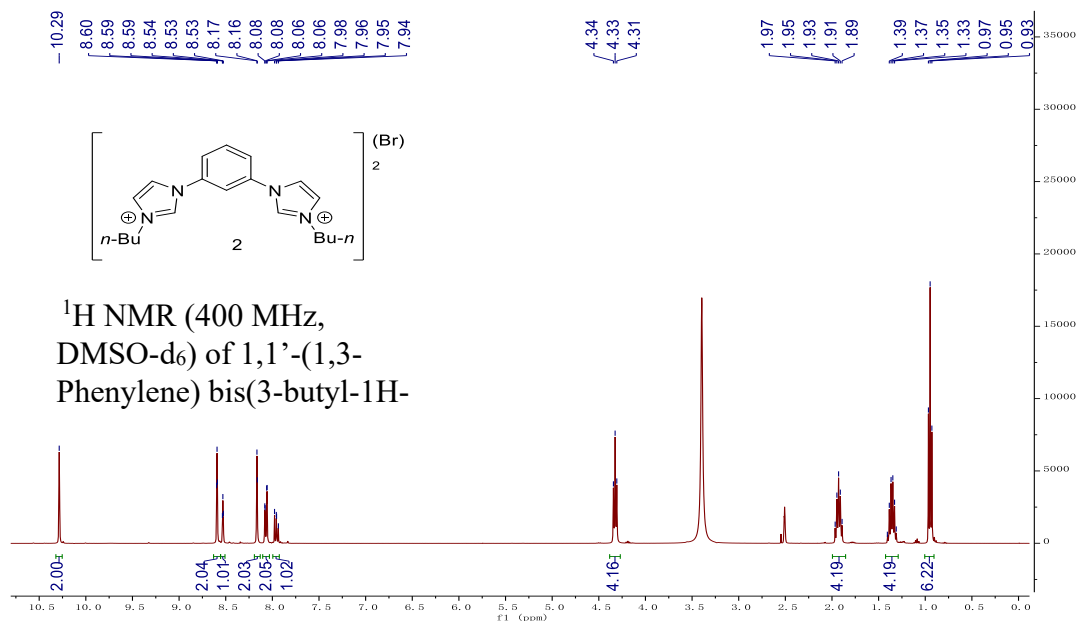

<sup>1</sup>H NMR (400 MHz, DMSO-d<sub>6</sub>) of 1,1'-(1,3-Phenylene) bis(3-butyl-1H-imidazolium) Bromide

Supplementary figure 3. <sup>1</sup>H NMR of 1,1'-(1,3-Phenylene) bis(3-butyl-1H-imidazolium) Bromide in DMSO-d<sub>6</sub>.

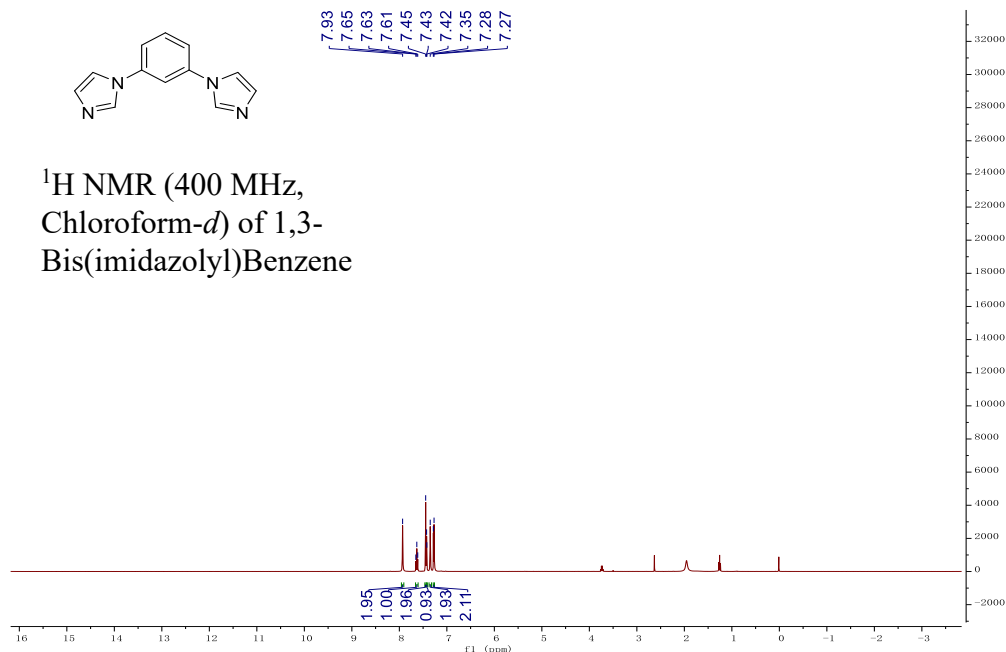

Supplementary figure 4.  $^1\text{H}$  NMR of 1,3-Bis(imidazolyl)Benzene in  $\text{CDCl}_3$ .

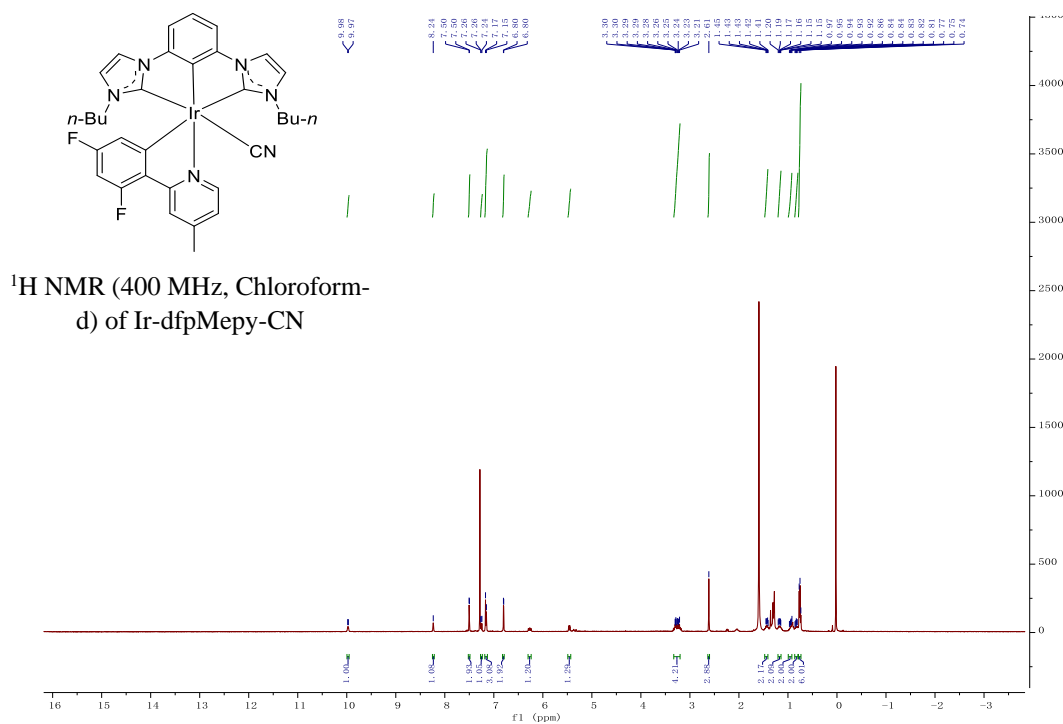

Supplementary figure 5.  $^1\text{H}$  NMR of Ir-dfpMepy-CN in  $\text{CDCl}_3$ .

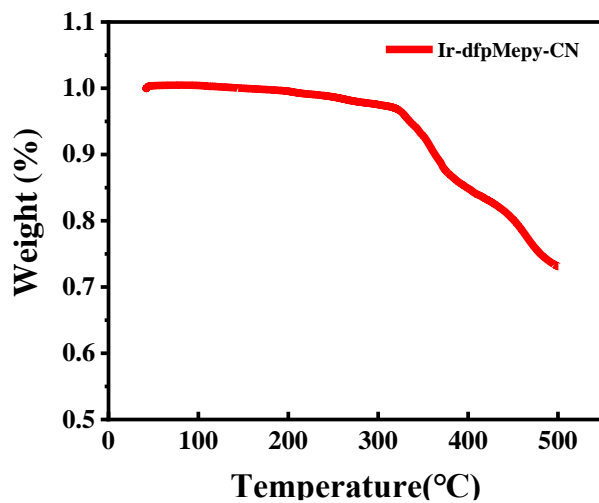Supplementary figure 6. Thermogravimetric analysis of the **Ir-dfMepy-CN**.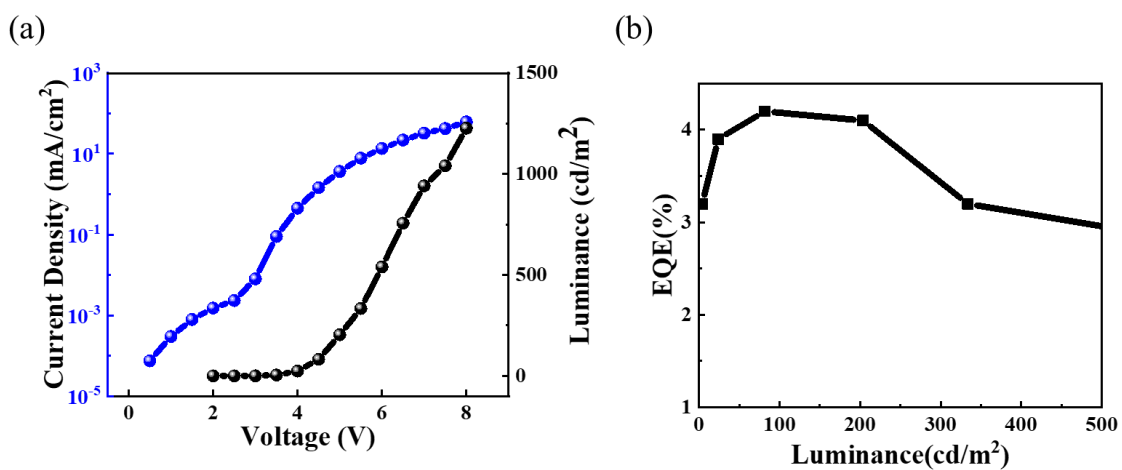

Supplementary figure 7. (a) J-V and L-V curves and (b) External quantum efficiency of the device.

## 2 TD-DFT simulation results

Table S1 The calculated wavelength and charge transfer character of the optical transitions

|   | State | Energy(eV) | $\lambda$ (nm) | Assignments                                                                                                                          |
|---|-------|------------|----------------|--------------------------------------------------------------------------------------------------------------------------------------|
| 1 | T1    | 2.8695     | 432            | HOMO-3 $\rightarrow$ LUMO 44.6% (LLCT & LC)<br>HOMO-2 $\rightarrow$ LUMO 12.5% (MLCT)<br>HOMO-1 $\rightarrow$ LUMO 21.8% (MLCT & LC) |

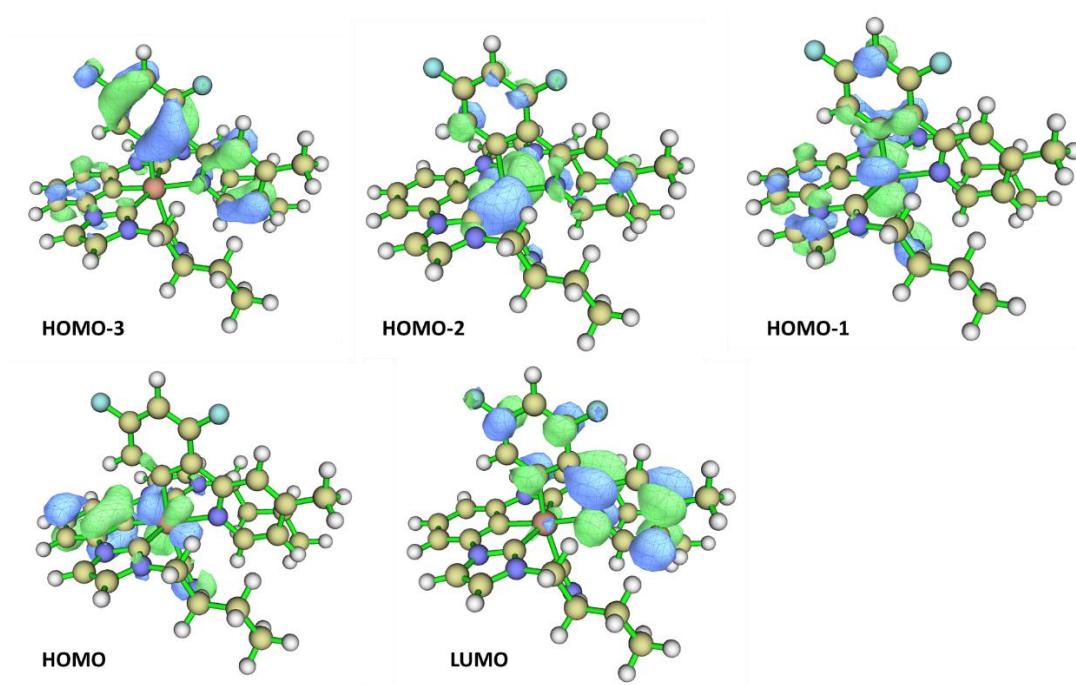

Supplementary figure 8. The frontier molecular orbitals calculated at T<sub>1</sub> geometries.
